# Supplementary material for: Diabetes impairs cardioprotective function of endothelial progenitor cell-derived extracellular vesicles via H3K9Ac inhibition
Source: PubMed Central journal article supplement (PMC9169353; doi:10.7150/thno.70821), 2022-05-21
Supplement: thnov12p4415s1.pdf [file thnov12p4415s1.pdf]

## **ONLINE SUPPLEMENT**

### **Diabetes impairs cardioprotective function of endothelial progenitor cell-derived extracellular vesicles via H3K9Ac inhibition**

Grace Huang<sup>1</sup>, Zhongjian Cheng<sup>1</sup>, Alycia Hildebrand<sup>1</sup>, Chunlin Wang<sup>1</sup>, Maria Cimini<sup>1</sup>, Rajika Roy<sup>1</sup>, Anna Maria Lucchese<sup>1</sup>, Cindy Benedict<sup>1</sup>, Vandana Mallareddy<sup>1</sup>, Ajit Magadam<sup>1</sup>, Darukeshwara Joladarashi<sup>1</sup>, Charan Thej<sup>1</sup>, Carolina Gonzalez<sup>1</sup>, May Trungcao<sup>1</sup>, Venkata Naga Srikanth Garikipati<sup>2,3</sup>, John W. Elrod<sup>1,4</sup>, Walter J. Koch<sup>1,4</sup> and Raj Kishore<sup>1,4</sup>

## **Expanded Materials and Methods**

### ***Induction of myocardial infarction***

The ligation of the left anterior descending (LAD) coronary artery was performed as a permanent MI model described previously [13]. Mice were under anesthesia using 2% isoflurane inhalation with an isoflurane delivery system (Viking Medical, Medford, NJ) during surgery. Immediately after LAD ligation, mice received an intramuscular injection of  $1 \times 10^9$  db/+ EPC-EV particles (n = 10),  $1 \times 10^9$  db/db EPC-EV particles (n = 10) or vehicle (n = 10) in a total volume of 20  $\mu$ l at 3 different sites (basal anterior, mid anterior and apical anterior) in the peri-infarct area. Echocardiography for left ventricle (LV) functional studies before MI (baseline) and at 1-, 2-, 3- and 4-weeks after MI was recorded. Histology analyses for structural remodeling and capillary density were performed at 4 weeks post-MI.

### ***Induction of ischemia reperfusion***

Left coronary artery (LCA) ligation and ischemia reperfusion were performed as below. In brief, mice on C57/BL6N strain were anesthetized with 50 mg/kg of Ketamine combined with 8mg/kg of xylazine with 50U heparin and 200  $\mu$ l of sterile saline. Once mice are fully

anesthetized, they are intubated and put on a ventilator. The heart was exposed via a left thoracotomy between the second and third ribs. A knot was placed around the LCA, and a PE10 tube that was 3-mm in length was placed on top of the LCA to allow for reperfusion. The heart was rinsed with sterile saline, and the wound was covered by parafilm for 45 minutes of the ischemic period. Immediately after the LCA was released (PE10 tube was released and the suture was removed),  $5 \times 10^9$  db/+ EPC-EV,  $5 \times 10^9$  diabetic EPC-EV,  $2 \times 10^5$  nontreated or VPA-treated diabetic EPC-EV or saline in a total volume of 20  $\mu$ l were given by intramyocardial injection. Mice were monitored during the whole surgery procedure. The ischemic zone was allowed to reperfuse for 24 hours. After LCA re-ligation, hearts were injected with 2% Evans blue dye to distinguish viable tissue from an area at risk to measure infarct size. 1-mm heart thick sections were cross-sectioned and incubated with 1% triphenyl tetrazolium chloride (TTC) (Sigma, T8877) for 5 min at 37°C to delineate infarcted tissue. All five 1-mm myocardial slices were weighed, imaged, and the second slices were fixed in 4% PFA. All values such as the infarct area, area at risk, and viable tissue were assessed using ImageJ as previously reported<sup>23</sup>.

### **MCEC and Neonatal rat cardiomyocyte (NRVM) culture and treatment**

MCEC was purchased from CEDARLANE (CLU510) and cultured on 0.2% Gelatin (Sigma)-coated dishes and maintained in 4.5 g/ml DMEM supplemented with 5% EV-depleted-FBS, Penicillin-Streptomycin (P/S), 10 mM HEPES (Sigma). For H<sub>2</sub>O<sub>2</sub>-induced cell apoptosis assay in endothelial cells, 1X10<sup>4</sup> MCECs were cultured in Exo-depleted culture media and treated with vehicle, 1X 10<sup>6</sup> db/+ EPC-EV, or 1X 10<sup>6</sup> diabetic EPC-EV for 24 hours following 100 μM H<sub>2</sub>O<sub>2</sub> treatment for 4 to 5 hours. MCECs were then fixed in 4% paraformaldehyde (PFA) for TUNEL staining, and cell lysates were collected for Caspase 3/7 measurement (Promega, G811C). For VPA studies, MCECs were treated with vehicle, 1X 10<sup>6</sup> db/+ EPC-EV or 1X 10<sup>6</sup> diabetic EPC-EV or db/db EPC-EV from cells treated with 1 mM VPA for 24 hours. MCECs were lysed and subjected to Western blotting. NRVM was kindly provided by Dr. Walter J Koch's lab. For hypoxia and starvation study in expanding NRVMs, cells were isolated from one- to two-day-old rat pups and were cultured in Ham's F-10 media (Corning) supplemented with 10% horse serum, 5% FBS. After 24 hours of isolation, media was changed to F-10 media supplemented with 5% Exo-depleted FBS. After NRVM was attached completely and presented beating phenotype, 1X10<sup>6</sup> NRVM were treated with vehicle, 1X 10<sup>8</sup> db/+ EPC-EV, or 1X 10<sup>8</sup> diabetic EPC-EV for 24 hours in serum-free F-10 media following incubation in the hypoxia chamber for 48 hours. NRVM were then fixed in 4% PFA for

TUNEL staining, and cell lysates were used for Caspase 3/7 measurement (Promega, G811C).

### ***Chromatin immunoprecipitation sequencing (ChIP-seq)***

MCECs were fixed with 1% formaldehyde for 15 min and quenched with 0.125 M glycine after db/+ or db/db EPC-EV treatment for 24 hours and then subjected to ChIP-seq (Active Motif, Inc.) In brief, chromatin was isolated by adding lysis buffer, followed by disruption with a Dounce homogenizer. Lysates were sonicated, and the DNA sheared to an average length of 300-500 bp with Active Motif's EpiShear probe sonicator (53051) and cooled sonication platform (53080). Genomic DNA (Input) was prepared by treating aliquots of chromatin with RNase, proteinase K, and heat for de-crosslinking, followed by SPRI beads clean up. Clariostar quantified eluted DNA. Extrapolation to the original chromatin volume allowed quantitation of the total chromatin yield. An aliquot of chromatin (30 mg) was precleared with protein A agarose beads (Invitrogen). Genomic DNA regions of interest were isolated using 5 ul antibody against H3K9Ac (Active Motif cat# 39917). Complexes were washed, eluted from the beads with SDS buffer, and subjected to RNase and proteinase K treatment. Crosslinks were reversed by incubation overnight at 65°C, and ChIP DNA was purified by phenol-chloroform extraction and ethanol precipitation.

Illumina sequencing libraries were prepared from the ChIP and Input DNAs using the standard consecutive enzymatic steps of end-polishing, dA-addition, and adaptor ligation using Active Motif's custom liquid handling robotics pipeline. After the final 18 cycle PCR amplification step, the resulting DNA libraries were quantified and sequenced on Illumina NexSeq 500. Sequences (75 bp, single-end) were aligned to the mouse genome (mm10) using the BWA algorithm (default settings). Duplicate reads were removed, and only uniquely mapped reads (mapping quality  $\geq 25$ ) were used for further analysis. Alignments were extended in silico at their 3'-ends to a length of 200 bp, which is the average genomic fragment length in the size-selected library, and assigned to 32-nt bins along the genome. The resulting histograms (genomic "signal maps") were stored in BigWig files. Peaks were identified using the MACS 2.1.0 algorithm at a cutoff of p-value  $1e-7$ , without control file, and with the `-nomodel` option. Peaks that were on the ENCODE blacklist of known false ChIP-Seq peaks were removed. Signal maps and peak locations were used as input data to Active Motifs proprietary analysis program, which creates Excel tables containing detailed information on sample comparison, peak metrics, peak locations, and gene annotations.

## **SUPPLEMENTARY FIGURES**



**Figure S1: Physiological parameters and EPC-EVs characterization from diabetic and non-diabetic mice.** (A) The bodyweight of 10-week-old mice was measured before EPC isolation. (B) Whole blood was collected without pre-fasting for blood glucose measurement using the OneTouch ULTRA2 glucose meter. (C-D) EV particle number of db/+ and db/db EPCs is in average of  $5 \times 10^7$  from  $3 \times 10^5$  number of cells and (C-E) with a diameter of approximately 150 nm measured by Nanosight. (F). Identification of EVs by EV marker proteins Alix and HSP70. Both db/+ and db/db EPC-EVs expressed Alix and HSP70. All Data shown as mean  $\pm$  SEM.  $n > 3$ . \*\*\*\*  $P < 0.0001$ .



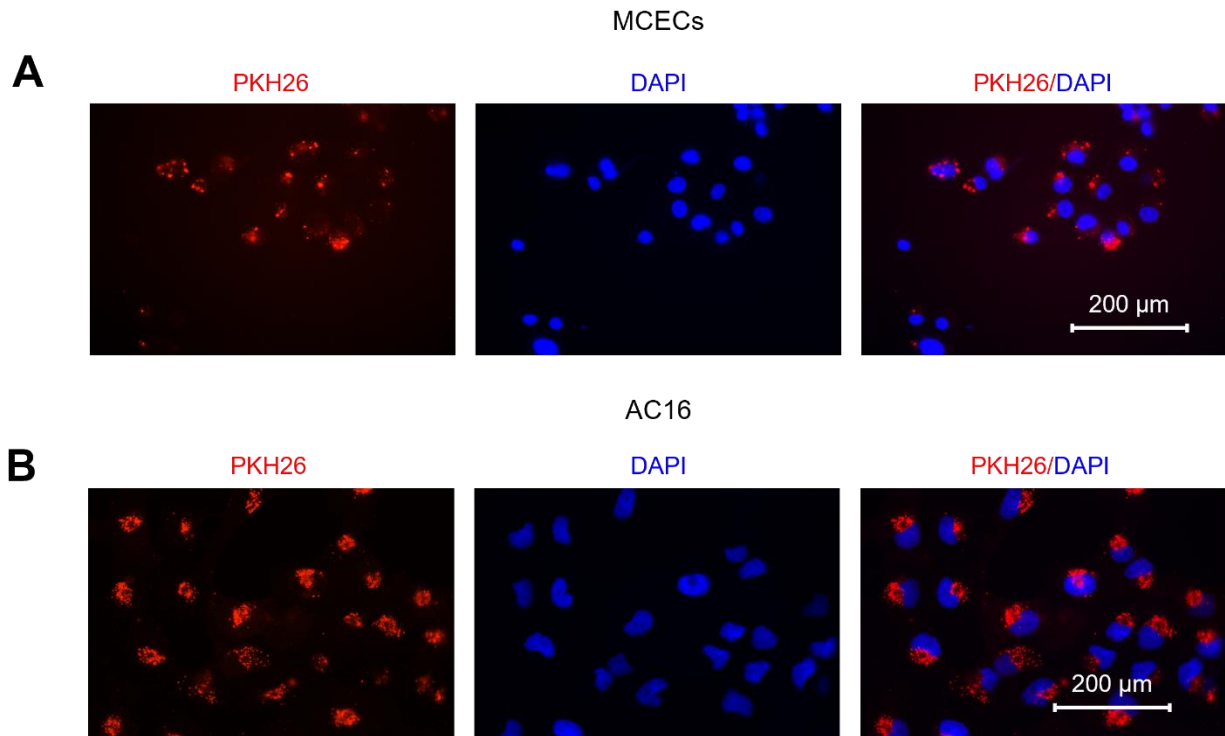

**Figure S2: Uptake of PKH26-labeled EPC-EVs by MCECs (A) and AC16 cells (B).** EPC-EVs from db/+ mice were resuspended in 1 ml Diluent C and mixed with 1 ml stain solution (1 ml Diluent C + 4 μL PKH26) and incubated for 4 min on ice. Then equal volume of 1% BSA was added to stop the labeling reaction. Then the EVs were diluted with 1xPBS and collected on a 30% sucrose-D2O solution with ultracentrifugation (100,000g for 1 hour). Following separation on the sucrose gradient, the EVs were washed in 1xPBS and the pelleted EVs were suspended in desired volume of PBS and added to MCECs (A) and AC16 cardiomyocytes (B) cells. After 1.5 hrs, the EV-treated MCECs and AC16 cells

were washed with 1xPBS and fixed with 4% PFA for 10 min on ice. Images were acquired using the Niko Eclipse Ti Florescence microscope using 20x objectives.

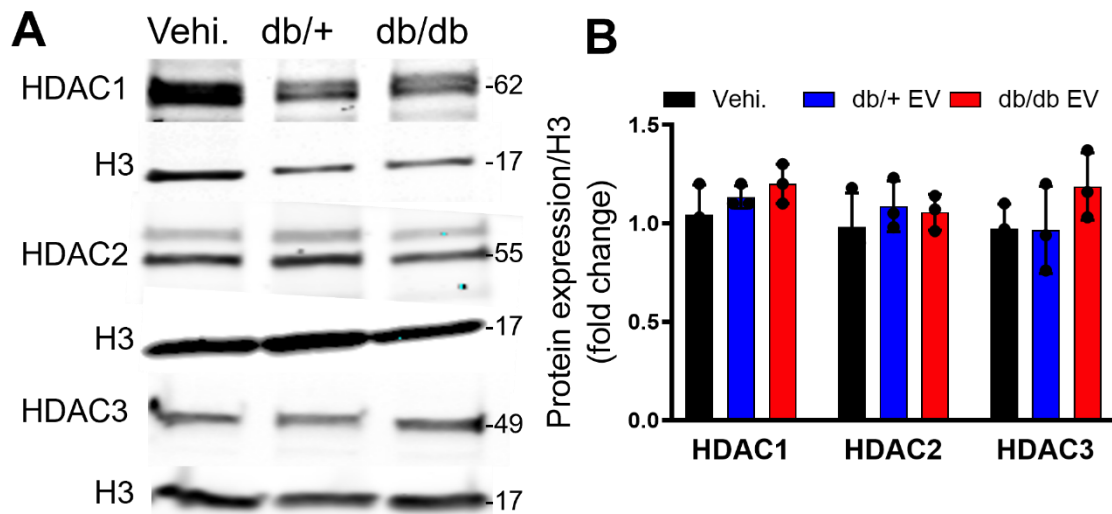

**Figure S3. Non-Diabetic EPC-EVs and diabetic EPC-EVs do not not significantly change HDAC1, HDAC2 and HDAC3 expression in recipient MCECs.** (A) MCECs were treated with vehicle, db/+ or db/db EPC-EVs for 24 hours. Cells were collected, lysed, and subjected to Western blotting using HDAC1, HDAC2, and HDAC3 antibodies. (B) Quantification analysis showed that db/db-EPC-EV trend to increase HDAC1-3 protein but did not achieve statistical significance in protein expression. All Data are shown as mean  $\pm$  SEM. n=3 for each group. HDAC, histone deacetylases. Vehi., vehicle.

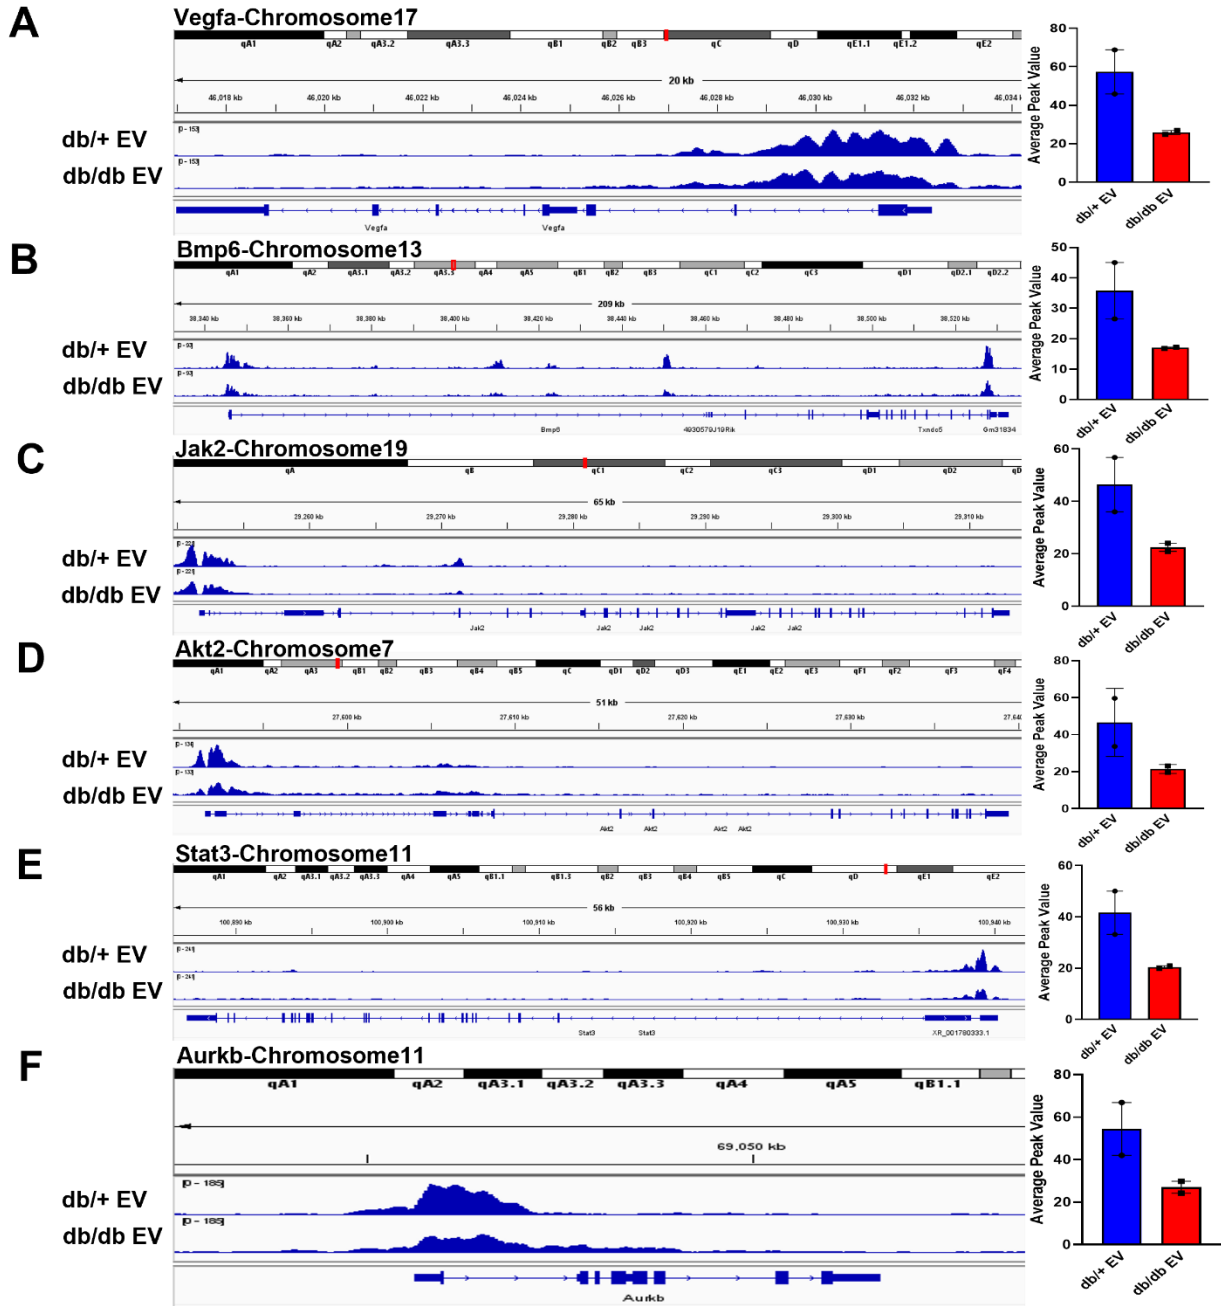

**Figure S4. db/db EPC-EV decrease H3K9Ac level at TSS of survival/proliferative gene in MCECs.** (A-F) Integrative genomics viewer (IGV) software was used to view the fragment density of H3K9Ac (y-axis) aligned along with the gene coordinates (x-axis). Data are presented as bar graphs representing the mean. n=2 for each group. Vehi., vehicle.

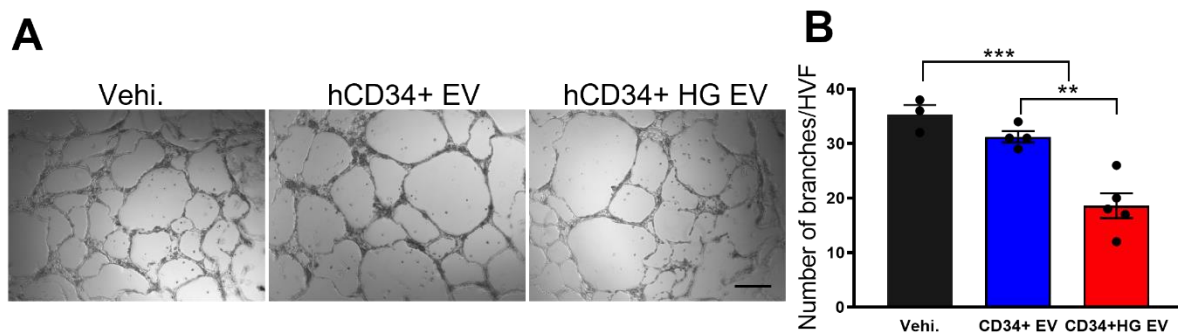

**Figure S5. Hyperglycemia alters human hematopoietic stem cell-derived EV function.** (A) Human CD34+ cell-EVs under hyperglycemic insult reduced tubulogenesis in HMVECs. Tubulogenesis in human microvascular endothelial cells treated with vehicle, CD34+ cell-EV or CD34+ cell HG-EV. (B) Quantification analysis of branch number per HVF. Scale bar = 100 mm. All Data are shown as mean  $\pm$  SEM, n $\geq$ 3 for each group. \*\*\*  $P < 0.001$ , \*\*  $P < 0.01$ . hHSC, human hematopoietic; stem cell; HG, high glucose; HVF, high visual field; Vehi., vehicle.

## SUPPLEMENTAL TABLES

| RT-PCR primer (mRNA) |                         |                          |
|----------------------|-------------------------|--------------------------|
| Primer name          | Primer sequence forward | Primer sequence reverse  |
| Sox12                | GGAGACGGTGGTATCTGGG     | ATCATCTCGGTAACCTCGGGG    |
| Pdgfd                | TACAGTTGCACTCCCAGGAAT   | CTTCCAGTTGACAGTTCCGCA    |
| Gapdh                | CGTGTTCCCTACCCCAATGT    | TGTCATCATACTTGGCAGGTTTCT |

**Table S1. Primer sequences.** Sequences used for RT-PCR in mouse samples.

| Antibody           | Company                  | Product Number | Species | Primary Ab Conc. | Secondary Ab Conc. |
|--------------------|--------------------------|----------------|---------|------------------|--------------------|
| H3                 | Cell Signaling           | 14268S         | Mouse   | 1:2,000          | 1:10,000           |
| H3K9Ac             | Active Motif             | #39137         | Rabbit  | 1:1,000          | 1:10,000           |
| H3K9Me3            | Cell Signaling           | #13969         | Rabbit  | 1:500            | 1:5,000            |
| HDAC1              | Cell Signaling           | 34589T         | Rabbit  | 1:1,000          | 1:10,000           |
| HDAC2              | Cell Signaling           | 57156T         | Rabbit  | 1:1,000          | 1:10,000           |
| HDAC3              | Cell Signaling           | 85057T         | Rabbit  | 1:1,000          | 1:10,000           |
| Actin              | Cell Signaling           | #4970L         | Rabbit  | 1:2,000          | 1:10,000           |
| Donkey anti-Rabbit | Li-Cor                   | 926-32213      |         |                  | 1:10,000           |
| Donkey anti-Mouse  | Li-Cor                   | 926-68072      |         |                  | 1:10,000           |
| Alix               | Proteintech              | 12422-1-AP     | Rabbit  | 1:2000           | 1:10,000           |
| HSP70 (3A3)        | Santa Cruz Biotechnology | Sc-32239       | Mouse   | 1:500            | 1:10,000           |

**Table S2. Antibody information.** Antibody information for Western Blot analysis.

|          |                  | Vehicle |       | Db/+ EPC-EV |       | Db/db EPC-EV |       |
|----------|------------------|---------|-------|-------------|-------|--------------|-------|
|          |                  | Mean    | SEM   | Mean        | SEM   | Mean         | SEM   |
| Baseline | Heart Rate (bpm) | 483.39  | 20.70 | 455.93      | 13.52 | 463.61       | 24.52 |
|          | ESD (mm)         | 2.33    | 0.06  | 2.65        | 0.08  | 2.61         | 0.11  |
|          | EDD (mm)         | 3.99    | 0.12  | 4.10        | 0.06  | 4.11         | 0.11  |
|          | ESV (µl)         | 18.88   | 1.27  | 26.36       | 1.93  | 25.59        | 2.20  |
|          | EDV (µl)         | 70.05   | 4.88  | 74.38       | 2.69  | 75.44        | 4.37  |
|          | SV (µl)          | 51.18   | 4.06  | 48.02       | 2.24  | 49.84        | 2.80  |
|          | EF (%)           | 72.79   | 1.40  | 64.15       | 2.31  | 66.09        | 2.13  |
|          | FS (%)           | 41.42   | 1.26  | 34.91       | 1.65  | 36.32        | 1.65  |
|          | CO (ml/min)      | 24.4    | 1.40  | 21.76       | 1.06  | 22.85        | 1.29  |
| 1 Week   | Heart Rate (bpm) | 460.34  | 24.11 | 516.75      | 14.17 | 520.74       | 16.48 |
|          | ESD (mm)         | 4.01    | 0.13  | 3.91        | 0.19  | 3.83         | 0.17  |
|          | EDD (mm)         | 4.90    | 0.09  | 4.71        | 0.15  | 4.64         | 0.17  |
|          | ESV (µl)         | 70.92   | 5.39  | 69.15       | 7.38  | 65.37        | 6.50  |
|          | EDV (µl)         | 113.51  | 4.96  | 104.53      | 7.40  | 101.20       | 8.05  |
|          | SV (µl)          | 42.59   | 2.52  | 35.39       | 2.32  | 35.82        | 2.67  |
|          | EF (%)           | 37.93   | 2.68  | 35.43       | 3.47  | 36.23        | 3.06  |
|          | FS (%)           | 18.44   | 1.51  | 17.22       | 1.89  | 17.55        | 1.65  |
|          | CO (ml/min)      | 19.67   | 1.72  | 18.20       | 1.15  | 18.52        | 1.37  |
| 2 Weeks  | Heart Rate (bpm) | 493.92  | 26.06 | 519.20      | 15.34 | 535.41       | 30.94 |
|          | ESD (mm)         | 4.25    | 0.19  | 4.04        | 0.18  | 4.50         | 0.29  |
|          | EDD (mm)         | 5.11    | 0.13  | 5.04        | 0.19  | 5.34         | 0.24  |
|          | ESV (µl)         | 82.18   | 7.90  | 74.40       | 7.79  | 97.83        | 13.36 |
|          | EDV (µl)         | 124.97  | 7.31  | 123.46      | 10.29 | 141.71       | 14.23 |
|          | SV (µl)          | 42.80   | 2.73  | 49.06       | 3.47  | 43.88        | 3.32  |
|          | EF (%)           | 34.85   | 3.54  | 40.47       | 2.02  | 33.59        | 3.92  |
|          | FS (%)           | 16.91   | 1.97  | 19.92       | 1.13  | 16.40        | 2.15  |
|          | CO (ml/min)      | 20.92   | 1.30  | 25.22       | 1.70  | 23.62        | 2.39  |
| 3 Weeks  | Heart Rate (bpm) | 470.48  | 25.99 | 511.27      | 16.02 | 496.30       | 16.11 |
|          | ESD (mm)         | 4.37    | 0.28  | 3.84        | 0.20  | 4.86         | 0.20  |
|          | EDD (mm)         | 5.22    | 0.22  | 4.93        | 0.19  | 5.51         | 0.20  |
|          | ESV (µl)         | 89.49   | 14.16 | 67.05       | 8.26  | 113.51       | 11.06 |
|          | EDV (µl)         | 132.56  | 13.24 | 117.17      | 10.34 | 150.69       | 12.74 |
|          | SV (µl)          | 43.07   | 4.89  | 50.12       | 3.09  | 37.18        | 3.84  |
|          | EF (%)           | 34.29   | 4.49  | 44.63       | 2.60  | 24.54        | 2.06  |
|          | FS (%)           | 16.72   | 2.47  | 22.38       | 1.50  | 11.52        | 1.05  |
|          | CO (ml/min)      | 20.12   | 2.47  | 25.27       | 1.30  | 18.28        | 1.77  |

|                |                         |        |       |        |       |        |       |
|----------------|-------------------------|--------|-------|--------|-------|--------|-------|
| <b>4 Weeks</b> | <b>Heart Rate (bpm)</b> | 413.49 | 26.97 | 473.25 | 16.10 | 485.46 | 17.82 |
|                | <b>ESD (mm)</b>         | 4.27   | 0.22  | 4.29   | 0.22  | 5.05   | 0.22  |
|                | <b>EDD (mm)</b>         | 4.94   | 0.21  | 5.38   | 0.18  | 5.66   | 0.19  |
|                | <b>ESV (µl)</b>         | 83.86  | 10.31 | 86.50  | 10.43 | 124.41 | 12.96 |
|                | <b>EDV (µl)</b>         | 116.78 | 11.34 | 143.22 | 11.36 | 160.15 | 12.87 |
|                | <b>SV (µl)</b>          | 32.91  | 5.72  | 56.72  | 3.34  | 35.74  | 1.70  |
|                | <b>EF (%)</b>           | 28.73  | 4.14  | 41.30  | 3.03  | 23.43  | 1.99  |
|                | <b>FS (%)</b>           | 13.68  | 2.14  | 20.66  | 1.71  | 10.96  | 0.96  |
|                | <b>CO (ml/min)</b>      | 13.37  | 2.11  | 26.94  | 1.99  | 17.26  | 0.89  |

**Table S3: Echo data table for vehicle, db/+ EPC-EV and db/db EPC-EV injected mice following MI surgery – Mean and standard error of the mean for variables measured using VevoStrain analysis at baseline, 1-, 2-, 3- and 4- weeks post-surgery. n=7 for vehicle group, n=13 for db/+ EPC-EV group, n=11 for db/db EPC-EV group.**



| Gene List                           | db+ EPC-1 | db+ EPC-2 | dbdb EPC-1 | dbdb EPC-2 | pvalue  |
|-------------------------------------|-----------|-----------|------------|------------|---------|
| 1110034G24Rik                       | 37.425    | 50.475    | 21.350     | 22.225     | 0.00169 |
| 1700017L05Rik                       | 43.933    | 51.533    | 18.267     | 22.667     | 0.02251 |
| 1700023L04Rik                       | 26.880    | 40.360    | 17.920     | 15.120     | 0.01935 |
| 1700063D05Rik                       | 44.583    | 62.083    | 29.750     | 23.167     | 0.04410 |
| 2310008H04Rik                       | 36.812    | 49.938    | 19.000     | 18.188     | 0.02687 |
| 2310008H04Rik                       | 26.809    | 36.095    | 13.809     | 15.524     | 0.00969 |
| 2310022A10Rik, Akt2                 | 33.611    | 59.611    | 19.722     | 23.111     | 0.00797 |
| 2310043O21Rik                       | 33.647    | 50.294    | 21.941     | 19.059     | 0.09055 |
| 2310047M10Rik, Tmem107              | 43.182    | 76.636    | 13.818     | 24.182     | 0.00448 |
| 2810055G20Rik                       | 31.656    | 53.875    | 18.188     | 16.312     | 0.00055 |
| 3830408C21Rik                       | 32.683    | 50.342    | 18.000     | 20.146     | 0.00002 |
| 4930525G20Rik, Zfp273               | 43.621    | 62.345    | 27.000     | 25.793     | 0.00027 |
| 4930573C15Rik                       | 51.625    | 52.688    | 24.125     | 20.250     | 0.01100 |
| 4933405D12Rik, 1810037117Rik, Usp53 | 44.750    | 68.750    | 26.583     | 28.583     | 0.03842 |
| 4933433H22Rik                       | 58.000    | 70.538    | 28.000     | 30.000     | 0.01639 |
| 5033411D12Rik, Mplkip               | 30.120    | 44.160    | 18.000     | 17.720     | 0.06372 |
| 5830418K08Rik                       | 46.733    | 74.200    | 31.600     | 23.867     | 0.01297 |
| 6030466F02Rik                       | 26.435    | 43.522    | 16.956     | 14.696     | 0.00788 |
| 8030442B05Rik, Gm13293              | 43.500    | 58.182    | 19.727     | 25.409     | 0.00340 |
| 9130015A21Rik                       | 25.242    | 34.667    | 11.788     | 11.424     | 0.00046 |
| 9230104L09Rik                       | 42.429    | 63.184    | 25.020     | 23.694     | 0.00000 |
| 9330175M20Rik                       | 32.467    | 49.133    | 13.467     | 14.733     | 0.00047 |
| 9330175M20Rik                       | 45.522    | 56.304    | 20.478     | 25.391     | 0.00324 |
| A330021E22Rik                       | 21.350    | 39.800    | 13.250     | 10.950     | 0.02051 |
| A330021E22Rik                       | 33.056    | 42.611    | 15.833     | 16.722     | 0.01721 |
| Abca1                               | 38.857    | 45.943    | 22.714     | 18.771     | 0.00197 |
| Abca12                              | 37.294    | 61.647    | 20.941     | 20.118     | 0.01696 |
| Abca4                               | 43.080    | 56.800    | 21.040     | 27.480     | 0.00511 |
| Abcd4                               | 45.368    | 59.579    | 26.053     | 23.000     | 0.09566 |
| Ablim2, Afap1                       | 44.083    | 76.917    | 23.000     | 24.917     | 0.00951 |
| Acap2                               | 32.214    | 60.071    | 22.214     | 22.643     | 0.25609 |
| Acsl4                               | 26.783    | 36.696    | 13.652     | 14.261     | 0.01544 |
| Actn1                               | 31.950    | 48.750    | 19.150     | 18.550     | 0.02314 |
| Actr10, Psma3                       | 51.136    | 73.818    | 26.409     | 29.818     | 0.00006 |
| Actr1b, 4933424G06Rik               | 25.571    | 57.714    | 14.571     | 19.143     | 0.02029 |
| Actrt3, Mynn                        | 38.562    | 53.188    | 22.500     | 17.938     | 0.01367 |
| Adamtsl3                            | 24.345    | 32.414    | 13.483     | 14.414     | 0.09991 |
| Ahnak                               | 46.400    | 49.200    | 29.867     | 17.333     | 0.09005 |
| AK157302, Zkscan8                   | 38.393    | 57.036    | 17.464     | 20.929     | 0.00020 |
| Ak5                                 | 22.000    | 39.692    | 14.846     | 14.346     | 0.01503 |
| Akap6                               | 29.125    | 39.562    | 16.031     | 14.594     | 0.00067 |

|                                |        |         |        |        |         |
|--------------------------------|--------|---------|--------|--------|---------|
| Akirin2                        | 28.278 | 46.111  | 20.944 | 15.944 | 0.15544 |
| Akr1b3                         | 51.524 | 64.952  | 30.905 | 26.524 | 0.00290 |
| Anapc1                         | 37.000 | 45.737  | 18.526 | 21.632 | 0.04812 |
| Anapc1, Mertk                  | 37.387 | 57.452  | 24.387 | 22.355 | 0.00100 |
| Anxa1                          | 44.260 | 62.040  | 22.700 | 27.180 | 0.00000 |
| Anxa3                          | 53.200 | 71.067  | 30.067 | 23.533 | 0.01218 |
| Ap4e1                          | 36.885 | 54.308  | 17.808 | 20.615 | 0.00097 |
| Apbb2                          | 30.226 | 39.323  | 18.323 | 16.194 | 0.01975 |
| Apoa5, Zfp259, Bud13           | 42.077 | 64.231  | 21.769 | 24.308 | 0.02802 |
| Appl2                          | 24.980 | 41.020  | 18.061 | 14.531 | 0.00277 |
| Arhgap26                       | 23.333 | 33.208  | 14.833 | 13.375 | 0.04539 |
| Arhgef28                       | 26.448 | 31.414  | 14.414 | 14.448 | 0.02534 |
| Arid5b                         | 21.891 | 36.239  | 13.000 | 14.522 | 0.00499 |
| Arl14epl                       | 33.741 | 50.407  | 19.444 | 17.000 | 0.00173 |
| Armc2                          | 25.857 | 52.571  | 15.071 | 19.143 | 0.04696 |
| Armc2                          | 27.222 | 41.926  | 14.074 | 16.259 | 0.00700 |
| Armc9                          | 36.333 | 47.714  | 18.238 | 19.809 | 0.00693 |
| Arnt2                          | 37.750 | 50.188  | 18.250 | 22.062 | 0.01538 |
| Atad2, Wdyhv1                  | 39.062 | 60.500  | 22.000 | 20.875 | 0.01551 |
| Atf7ip                         | 26.615 | 31.654  | 12.039 | 13.423 | 0.00638 |
| Atg16l1                        | 30.625 | 46.250  | 19.875 | 15.375 | 0.07670 |
| Atp5g1                         | 40.333 | 60.067  | 25.000 | 25.133 | 0.05209 |
| Atp5g2, Mir688                 | 27.000 | 44.056  | 15.111 | 17.833 | 0.02282 |
| Atp6v0a4                       | 41.857 | 61.429  | 19.786 | 24.000 | 0.00949 |
| B3gntl1                        | 45.700 | 67.850  | 21.650 | 25.400 | 0.00186 |
| Bbs4                           | 45.118 | 64.706  | 29.765 | 23.235 | 0.01184 |
| BC053749, Hspb6, Lin37, Psenen | 48.931 | 68.517  | 29.000 | 29.310 | 0.00062 |
| Bdh1                           | 34.000 | 49.357  | 16.571 | 21.571 | 0.04776 |
| Bicc1                          | 24.763 | 37.500  | 14.658 | 15.921 | 0.00356 |
| Blm                            | 50.000 | 83.056  | 34.556 | 31.500 | 0.00145 |
| Bmp6                           | 26.571 | 45.082  | 16.857 | 17.265 | 0.00073 |
| Bmper                          | 27.542 | 49.750  | 18.083 | 20.375 | 0.05625 |
| Bnc2                           | 31.792 | 55.167  | 17.625 | 22.792 | 0.00841 |
| Brca1, Nbr1                    | 94.000 | 137.947 | 52.842 | 53.842 | 0.00002 |
| Btd                            | 41.833 | 58.833  | 21.250 | 21.083 | 0.00925 |
| Btg1                           | 20.689 | 28.844  | 12.178 | 11.111 | 0.00424 |
| C1rl                           | 23.706 | 46.706  | 14.882 | 18.765 | 0.02085 |
| Cacul1                         | 64.188 | 109.188 | 40.062 | 41.500 | 0.00441 |
| Capn7                          | 35.750 | 62.938  | 24.188 | 23.688 | 0.12398 |
| Casp1, Casp4                   | 23.538 | 33.692  | 15.692 | 12.500 | 0.04544 |
| Casp8ap2                       | 41.077 | 79.231  | 30.923 | 28.462 | 0.04477 |
| Ccdc134, Sreb2                 | 35.615 | 59.154  | 19.154 | 24.462 | 0.02225 |
| Ccdc63                         | 55.706 | 83.294  | 34.294 | 34.441 | 0.00005 |

|                          |        |        |        |        |         |
|--------------------------|--------|--------|--------|--------|---------|
| Ccnyl1                   | 42.500 | 55.071 | 23.214 | 24.143 | 0.07629 |
| Cdh23, 4632428N05Rik     | 28.556 | 43.833 | 18.000 | 14.722 | 0.02043 |
| Cenpp, Ogn               | 24.167 | 30.083 | 13.667 | 11.000 | 0.04519 |
| Cenpp, Omd               | 22.972 | 36.278 | 12.278 | 13.972 | 0.00360 |
| Cep112                   | 38.667 | 50.467 | 19.533 | 22.333 | 0.09686 |
| Cep128                   | 40.583 | 59.167 | 27.083 | 22.000 | 0.07933 |
| Cerk                     | 28.133 | 46.667 | 16.800 | 20.467 | 0.13411 |
| Chn2                     | 38.312 | 48.562 | 19.812 | 19.875 | 0.01399 |
| Chn2                     | 50.818 | 69.409 | 27.546 | 31.046 | 0.00324 |
| Chp1, 1700020I14Rik      | 49.882 | 63.941 | 27.471 | 23.882 | 0.01494 |
| Cln5                     | 35.684 | 55.053 | 20.158 | 19.526 | 0.00440 |
| Col18a1                  | 36.000 | 52.158 | 20.000 | 20.000 | 0.02438 |
| Col1a2                   | 50.733 | 70.600 | 26.733 | 26.200 | 0.00270 |
| Col3a1                   | 45.308 | 59.615 | 21.000 | 21.462 | 0.00613 |
| Col3a1                   | 48.015 | 70.076 | 28.758 | 30.015 | 0.00000 |
| Col5a2                   | 24.790 | 38.526 | 15.368 | 12.053 | 0.02119 |
| Cox18, Ankrd17           | 52.833 | 73.583 | 22.583 | 33.250 | 0.01777 |
| Cpe                      | 33.895 | 46.316 | 20.053 | 19.526 | 0.01227 |
| Creb3l2                  | 46.684 | 82.053 | 31.895 | 32.105 | 0.00821 |
| Cstl1                    | 36.692 | 66.077 | 24.385 | 21.615 | 0.01275 |
| Ctc1, Aurkb              | 42.000 | 66.909 | 24.227 | 29.864 | 0.00296 |
| Ctif                     | 55.455 | 76.454 | 37.182 | 26.454 | 0.11250 |
| Cttnbp2nl, 4930564D02Rik | 37.200 | 67.133 | 21.933 | 26.200 | 0.02840 |
| Dact3, Gng8              | 48.769 | 57.692 | 21.615 | 24.923 | 0.03050 |
| Ddc, 1700042O10Rik       | 33.692 | 59.538 | 16.769 | 27.077 | 0.07058 |
| Ddx4, Slc38a9            | 54.294 | 75.588 | 31.059 | 33.176 | 0.02334 |
| Ddx52, Synrg             | 53.933 | 74.133 | 34.867 | 27.067 | 0.02392 |
| Derl1                    | 24.000 | 38.870 | 15.087 | 13.913 | 0.00549 |
| Dhrs3                    | 26.462 | 46.769 | 19.205 | 15.026 | 0.00060 |
| Dhx33, Derl2             | 34.368 | 48.000 | 21.474 | 18.895 | 0.02224 |
| Disp1                    | 26.083 | 37.542 | 12.625 | 12.125 | 0.00364 |
| Dnajc16, Casp9           | 37.357 | 49.500 | 20.786 | 20.929 | 0.08795 |
| Dock5                    | 38.471 | 50.059 | 20.412 | 22.235 | 0.06985 |
| Dpep2                    | 27.471 | 42.059 | 15.706 | 18.588 | 0.03633 |
| Dtx2, Upk3b              | 48.077 | 68.538 | 23.308 | 21.692 | 0.00330 |
| E030003E18Rik            | 43.714 | 72.643 | 29.929 | 24.071 | 0.00953 |
| Ebpl, Kpna3              | 35.619 | 54.857 | 22.095 | 21.191 | 0.03464 |
| Eef2k, Polr3e            | 25.250 | 35.100 | 14.550 | 13.800 | 0.06012 |
| Elf1                     | 19.633 | 26.400 | 10.067 | 12.567 | 0.04349 |
| Epha7                    | 38.222 | 52.481 | 21.852 | 22.185 | 0.00267 |
| Esyt1, Zc3h10            | 33.000 | 54.700 | 21.850 | 18.950 | 0.00750 |
| Eya4                     | 28.682 | 39.318 | 16.864 | 12.500 | 0.00823 |
| Eya4                     | 25.310 | 35.448 | 14.621 | 13.931 | 0.02410 |

|                       |        |        |        |        |         |
|-----------------------|--------|--------|--------|--------|---------|
| Fam107b               | 57.850 | 88.350 | 39.900 | 32.900 | 0.00133 |
| Fam122b, Fam122c      | 33.579 | 53.789 | 22.579 | 19.474 | 0.01501 |
| Fam129a               | 17.750 | 31.375 | 8.458  | 8.083  | 0.00049 |
| Fam13c                | 29.529 | 50.647 | 17.000 | 18.882 | 0.02464 |
| Fam168a               | 38.667 | 44.333 | 15.833 | 21.389 | 0.01133 |
| Fam169b               | 36.448 | 45.069 | 18.517 | 15.448 | 0.00494 |
| Fam203a, Tssk5, Mroh1 | 48.600 | 63.267 | 29.600 | 23.533 | 0.03501 |
| Fam35a, Glud1         | 40.640 | 68.360 | 24.280 | 30.200 | 0.01751 |
| Fam71f1               | 20.147 | 30.147 | 11.618 | 11.794 | 0.01006 |
| Fbxo47                | 35.045 | 42.409 | 20.500 | 15.364 | 0.00684 |
| Fbxo5, Mtrf1l         | 57.917 | 72.750 | 33.000 | 26.917 | 0.01250 |
| Fcgr4                 | 52.938 | 76.625 | 32.500 | 30.562 | 0.01095 |
| Fez2                  | 26.973 | 37.973 | 14.757 | 17.676 | 0.03048 |
| Fhl3, Sf3a3           | 49.000 | 60.923 | 25.538 | 26.000 | 0.00431 |
| Fhl3, Sf3a3           | 38.217 | 63.304 | 24.174 | 26.000 | 0.00545 |
| Fiz1, Zfp524, Zfp865  | 51.778 | 80.611 | 32.667 | 32.500 | 0.01112 |
| Fndc7                 | 18.097 | 34.839 | 11.290 | 11.613 | 0.01249 |
| Fnip1                 | 25.000 | 47.353 | 17.235 | 17.529 | 0.09493 |
| Fras1                 | 36.857 | 44.619 | 15.809 | 21.095 | 0.01140 |
| Frmd4b                | 27.500 | 49.857 | 17.857 | 18.286 | 0.05070 |
| Frmd4b                | 28.304 | 34.304 | 15.435 | 15.609 | 0.08462 |
| Ftx                   | 32.696 | 46.413 | 20.217 | 18.087 | 0.00009 |
| Gm11351               | 18.226 | 29.645 | 12.839 | 11.000 | 0.01769 |
| Gm12216               | 35.222 | 52.500 | 23.833 | 18.556 | 0.03137 |
| Gm19651               | 32.062 | 56.625 | 20.562 | 23.688 | 0.01244 |
| Gm19705, Gm16880      | 37.913 | 55.217 | 22.261 | 20.696 | 0.00135 |
| Gm20139               | 31.212 | 48.424 | 16.697 | 15.242 | 0.00009 |
| Gm21552               | 38.357 | 57.857 | 26.000 | 20.214 | 0.01366 |
| Gm4613                | 32.357 | 46.464 | 19.393 | 18.607 | 0.00308 |
| Gm5082                | 28.059 | 34.324 | 17.147 | 12.471 | 0.01908 |
| Gm5084                | 33.875 | 44.500 | 18.688 | 19.688 | 0.02784 |
| Gm5503                | 37.545 | 53.727 | 21.546 | 16.591 | 0.00086 |
| Gm5546                | 28.346 | 39.923 | 14.808 | 16.846 | 0.01307 |
| Gm5627                | 42.176 | 56.529 | 18.706 | 20.177 | 0.00791 |
| Gm6116                | 33.000 | 49.471 | 20.353 | 20.118 | 0.05362 |
| Gm6185                | 37.312 | 56.000 | 23.750 | 22.875 | 0.03020 |
| Gm7550                | 28.920 | 36.400 | 11.880 | 15.040 | 0.00223 |
| Gm7550                | 45.474 | 67.526 | 24.842 | 22.368 | 0.00044 |
| Gm8883                | 33.250 | 57.667 | 21.000 | 17.250 | 0.01667 |
| Gm9895                | 27.412 | 46.059 | 16.059 | 18.294 | 0.07456 |
| Gnal, Chmp1b, Mppe1   | 23.192 | 28.231 | 13.308 | 12.077 | 0.11728 |
| Gnl3l                 | 38.897 | 51.552 | 17.621 | 21.276 | 0.00171 |
| Gnl3l                 | 29.000 | 42.767 | 18.567 | 17.233 | 0.01158 |

|                                                                           |        |        |        |        |         |
|---------------------------------------------------------------------------|--------|--------|--------|--------|---------|
| Gnpda1, Gm4949                                                            | 33.870 | 42.778 | 17.259 | 19.315 | 0.00001 |
| Golm1                                                                     | 38.450 | 47.800 | 20.300 | 14.650 | 0.00177 |
| Gpm6a                                                                     | 31.300 | 47.600 | 15.167 | 23.333 | 0.02282 |
| Gpr155                                                                    | 47.167 | 68.111 | 30.222 | 26.111 | 0.00754 |
| Grin3b, Tmem259, Cnn2                                                     | 55.421 | 95.790 | 30.368 | 35.632 | 0.00484 |
| Grk6                                                                      | 36.423 | 45.615 | 17.923 | 19.923 | 0.00375 |
| Gsg1                                                                      | 20.292 | 37.167 | 12.917 | 12.917 | 0.00590 |
| Gulp1                                                                     | 28.191 | 44.143 | 16.286 | 15.952 | 0.00805 |
| Gzmm, Bsg                                                                 | 46.806 | 65.000 | 27.968 | 27.194 | 0.00070 |
| Hbegf, Slc4a9                                                             | 39.375 | 62.938 | 24.000 | 24.812 | 0.04544 |
| Hdac1, Lck                                                                | 49.308 | 61.615 | 29.385 | 22.462 | 0.02171 |
| Hdac7                                                                     | 49.200 | 60.867 | 30.867 | 23.867 | 0.03770 |
| Hdgf, Mrpl24                                                              | 31.885 | 54.077 | 19.808 | 20.346 | 0.01896 |
| Hibch                                                                     | 33.667 | 50.800 | 23.333 | 17.800 | 0.04971 |
| Hist1h3c, Hist1h2bb, Hist1h2ab, Hist1h3b,<br>Hist1h4b, Hist1h4a, Hist1h3a | 31.087 | 35.739 | 16.217 | 16.478 | 0.04498 |
| Hmgn5                                                                     | 18.759 | 30.552 | 10.517 | 12.621 | 0.01543 |
| Idh1, Pikfyve                                                             | 59.556 | 87.926 | 35.185 | 36.111 | 0.00005 |
| Ifnar2                                                                    | 37.618 | 54.118 | 24.618 | 21.088 | 0.00304 |
| Ikzf2                                                                     | 42.151 | 62.758 | 29.788 | 21.606 | 0.00052 |
| Incenp                                                                    | 23.286 | 35.191 | 15.381 | 12.286 | 0.02498 |
| Ing3                                                                      | 32.250 | 49.050 | 18.500 | 18.450 | 0.00699 |
| Ints10                                                                    | 43.947 | 68.632 | 25.632 | 29.053 | 0.00996 |
| Irf2bpl                                                                   | 44.750 | 70.167 | 24.500 | 28.583 | 0.02591 |
| Itpr1                                                                     | 23.818 | 33.773 | 13.500 | 12.727 | 0.02871 |
| Ivd                                                                       | 37.526 | 55.158 | 16.210 | 22.632 | 0.00304 |
| Jak2                                                                      | 36.045 | 56.773 | 24.046 | 20.909 | 0.01551 |
| Kcnab1                                                                    | 27.750 | 44.438 | 13.500 | 13.312 | 0.02480 |
| Kcnab1                                                                    | 23.394 | 33.576 | 12.273 | 14.546 | 0.00395 |
| Kcnab1                                                                    | 41.138 | 60.207 | 24.207 | 26.241 | 0.00599 |
| Kctd17, Tmprss6                                                           | 45.500 | 74.000 | 26.375 | 30.188 | 0.00550 |
| Kif13b                                                                    | 23.600 | 27.500 | 12.667 | 12.667 | 0.01493 |
| Kif2c                                                                     | 41.387 | 65.452 | 26.710 | 25.839 | 0.00089 |
| Klf6                                                                      | 24.700 | 37.433 | 14.367 | 15.100 | 0.03453 |
| Kpna1, Wdr5b, Fam162a                                                     | 31.333 | 50.267 | 21.667 | 15.800 | 0.06452 |
| Lamc2                                                                     | 24.667 | 35.433 | 15.767 | 13.700 | 0.02055 |
| Lims1                                                                     | 34.786 | 53.143 | 21.821 | 18.429 | 0.00087 |
| Lims1                                                                     | 22.273 | 36.500 | 12.273 | 16.318 | 0.04796 |
| Lnpep                                                                     | 30.839 | 46.387 | 16.129 | 21.613 | 0.00218 |
| LOC100861595                                                              | 29.485 | 41.455 | 15.879 | 17.394 | 0.01381 |
| Lrif1                                                                     | 27.833 | 42.833 | 15.944 | 16.667 | 0.03171 |
| Lrp2                                                                      | 24.500 | 41.944 | 17.500 | 14.722 | 0.04275 |
| Lrrk1                                                                     | 25.500 | 42.917 | 16.792 | 16.958 | 0.02018 |

|                          |        |        |        |        |         |
|--------------------------|--------|--------|--------|--------|---------|
| Lrrn4                    | 55.368 | 79.947 | 22.579 | 26.632 | 0.00001 |
| Lrrn4                    | 25.400 | 43.033 | 13.433 | 18.000 | 0.00874 |
| Lsm11                    | 31.357 | 54.214 | 21.143 | 19.429 | 0.04722 |
| Ltn1                     | 25.200 | 39.850 | 14.400 | 17.200 | 0.03821 |
| Lyst                     | 32.312 | 48.188 | 13.188 | 12.375 | 0.00020 |
| Mad2l1                   | 51.312 | 64.500 | 29.812 | 24.188 | 0.01465 |
| Maml3                    | 40.882 | 57.176 | 24.412 | 24.471 | 0.00133 |
| March3                   | 48.214 | 71.000 | 25.429 | 31.286 | 0.01704 |
| Mast4                    | 35.050 | 43.850 | 17.800 | 20.850 | 0.03382 |
| Mdfic                    | 22.688 | 45.625 | 14.125 | 18.312 | 0.14467 |
| Mertk                    | 46.794 | 61.324 | 24.588 | 29.323 | 0.00421 |
| Metap1d                  | 23.312 | 44.375 | 14.562 | 15.625 | 0.06416 |
| Mettl20                  | 23.381 | 34.476 | 11.191 | 15.191 | 0.03759 |
| Mir5118                  | 45.581 | 59.065 | 26.936 | 24.355 | 0.00016 |
| Mog                      | 45.769 | 65.333 | 28.282 | 26.692 | 0.00002 |
| Morf4l2, BC065397        | 43.171 | 58.657 | 26.857 | 21.543 | 0.00025 |
| Mpp7                     | 31.444 | 47.833 | 15.333 | 17.944 | 0.01757 |
| Mrpl45                   | 50.480 | 76.800 | 30.400 | 31.920 | 0.00063 |
| Msantd4                  | 54.667 | 77.571 | 36.095 | 29.667 | 0.00648 |
| Mtcp1, Brcc3             | 33.323 | 38.581 | 16.871 | 19.064 | 0.02118 |
| Myl7, Gck                | 34.238 | 47.429 | 19.191 | 20.143 | 0.03360 |
| Myo1e                    | 24.480 | 34.840 | 12.680 | 14.920 | 0.01225 |
| Myo5a                    | 21.714 | 39.333 | 16.809 | 11.619 | 0.03491 |
| Mzf1                     | 45.111 | 81.889 | 33.556 | 27.111 | 0.09962 |
| N4bp2l2, Pds5b           | 50.143 | 71.071 | 27.500 | 26.786 | 0.00474 |
| Narg2                    | 34.600 | 45.350 | 20.400 | 13.100 | 0.00365 |
| Nckap5                   | 23.649 | 35.108 | 14.514 | 14.351 | 0.00740 |
| Ncoa7                    | 35.526 | 51.895 | 19.421 | 23.684 | 0.01521 |
| Ncs1                     | 30.667 | 48.067 | 16.733 | 17.867 | 0.02694 |
| Necap1                   | 32.964 | 41.179 | 17.893 | 18.357 | 0.00735 |
| Nell2                    | 53.769 | 60.615 | 24.538 | 30.462 | 0.09121 |
| Nhsl1                    | 31.500 | 47.500 | 17.500 | 20.167 | 0.00822 |
| Nmnat2                   | 30.107 | 43.143 | 17.036 | 17.500 | 0.00394 |
| Nmt2, Rpp38, Acbd7, Olah | 27.160 | 51.600 | 19.040 | 17.520 | 0.00901 |
| Nol11                    | 27.400 | 42.550 | 14.300 | 16.700 | 0.01533 |
| Nr1h4                    | 28.553 | 35.342 | 15.737 | 15.368 | 0.00555 |
| Nrd1                     | 50.222 | 77.407 | 27.185 | 28.407 | 0.00009 |
| Nrg2                     | 22.433 | 40.100 | 14.733 | 13.400 | 0.01676 |
| Nuf2                     | 32.947 | 55.684 | 22.632 | 20.474 | 0.00695 |
| Nup153                   | 27.895 | 39.368 | 16.158 | 14.947 | 0.09463 |
| Osbp                     | 53.818 | 83.182 | 34.909 | 33.182 | 0.04198 |
| Osbp19                   | 37.343 | 63.457 | 22.057 | 24.000 | 0.00001 |
| Pak6                     | 53.312 | 49.812 | 23.625 | 21.125 | 0.00441 |

|                              |        |        |        |        |         |
|------------------------------|--------|--------|--------|--------|---------|
| Pank3                        | 45.000 | 69.154 | 26.308 | 17.154 | 0.00377 |
| Papss1                       | 46.824 | 64.823 | 30.941 | 24.706 | 0.01332 |
| Pard3b                       | 40.143 | 58.071 | 22.143 | 22.214 | 0.01579 |
| Parn                         | 20.583 | 31.667 | 9.042  | 14.708 | 0.03171 |
| Parn                         | 26.790 | 45.316 | 14.316 | 20.632 | 0.10476 |
| Patl2, B2m, Trim69           | 33.375 | 50.375 | 18.583 | 18.333 | 0.00566 |
| Pcf11                        | 26.150 | 39.450 | 17.100 | 13.950 | 0.02066 |
| Pcm1                         | 42.474 | 68.210 | 22.579 | 25.368 | 0.00723 |
| Pdgd                         | 28.875 | 35.417 | 16.792 | 15.208 | 0.03606 |
| Pdzd2, Gm21706               | 37.538 | 61.077 | 21.692 | 24.692 | 0.02197 |
| Pgc                          | 38.913 | 58.696 | 22.391 | 23.174 | 0.00385 |
| Pgk1                         | 17.500 | 38.893 | 12.143 | 11.929 | 0.00198 |
| Pip5k1a, Vps72               | 41.235 | 61.647 | 21.235 | 24.412 | 0.00524 |
| Pkhd11l                      | 27.963 | 51.556 | 17.407 | 19.037 | 0.00768 |
| Pkhd11l                      | 32.391 | 48.783 | 18.196 | 21.674 | 0.00002 |
| Plxna4                       | 31.444 | 54.222 | 18.111 | 21.944 | 0.00765 |
| Poc1b                        | 29.840 | 42.500 | 16.720 | 17.940 | 0.00009 |
| Pot1a                        | 35.231 | 59.308 | 16.615 | 26.308 | 0.02483 |
| Ppp1cc                       | 45.643 | 66.571 | 23.786 | 28.571 | 0.02661 |
| Ppp1r12c, Tnnt1              | 36.889 | 65.778 | 26.963 | 23.037 | 0.01146 |
| Ppp1r15b                     | 48.870 | 77.696 | 31.652 | 29.000 | 0.00144 |
| Prkab2                       | 28.621 | 44.207 | 15.897 | 18.690 | 0.02910 |
| Prnp                         | 47.312 | 65.125 | 25.250 | 29.125 | 0.00998 |
| Prr14l, Depdc5               | 47.231 | 78.769 | 27.923 | 23.385 | 0.00449 |
| Prr14l, Depdc5               | 27.611 | 43.056 | 15.222 | 16.778 | 0.01499 |
| Prr14l, Depdc5               | 45.905 | 73.952 | 21.857 | 32.952 | 0.00937 |
| Prx                          | 26.640 | 43.400 | 14.040 | 20.760 | 0.04198 |
| Rab1                         | 44.929 | 63.357 | 22.714 | 27.571 | 0.00967 |
| Rab2b                        | 26.000 | 44.875 | 19.188 | 15.625 | 0.12485 |
| Rad51b                       | 23.690 | 36.241 | 15.690 | 13.655 | 0.02692 |
| Rasal2                       | 23.667 | 36.952 | 15.857 | 12.191 | 0.03198 |
| Rbpms                        | 44.343 | 60.343 | 24.086 | 27.657 | 0.00200 |
| Rfwd2                        | 66.409 | 79.136 | 37.773 | 34.864 | 0.00409 |
| Rgl1                         | 27.750 | 38.150 | 15.550 | 14.700 | 0.07520 |
| Rnf39, Ppp1r11, Znr1, Znr1as | 24.529 | 47.176 | 18.529 | 15.412 | 0.03728 |
| Rnu5g                        | 55.950 | 80.400 | 30.200 | 27.350 | 0.00003 |
| Rny3, Rny1                   | 39.020 | 52.320 | 23.020 | 21.380 | 0.00000 |
| Rock1                        | 38.522 | 60.696 | 22.696 | 25.174 | 0.02041 |
| Rps17, Cpeb1                 | 39.167 | 56.583 | 16.167 | 25.167 | 0.04806 |
| Rtdr1, Rab36                 | 44.154 | 56.154 | 23.462 | 26.231 | 0.07083 |
| Sec22a                       | 54.059 | 70.882 | 29.588 | 32.471 | 0.00527 |
| Sema3e                       | 37.895 | 66.158 | 21.053 | 26.105 | 0.00538 |
| Sepp1, Ccdc152               | 56.781 | 81.366 | 32.024 | 34.805 | 0.00000 |

|                              |        |        |        |        |         |
|------------------------------|--------|--------|--------|--------|---------|
| Sesn1                        | 37.182 | 68.364 | 24.636 | 24.364 | 0.03569 |
| Sh2b1, Tufm, Atxn2l          | 28.722 | 45.833 | 13.556 | 13.778 | 0.00340 |
| Sh3rf1, 1700001D01Rik        | 29.583 | 59.000 | 20.042 | 21.458 | 0.01232 |
| Shb                          | 48.500 | 79.750 | 31.750 | 30.000 | 0.04062 |
| Slc10a6                      | 43.821 | 70.857 | 30.821 | 26.071 | 0.00133 |
| Slc1a3                       | 23.652 | 38.783 | 16.348 | 13.913 | 0.01357 |
| Slc25a30                     | 35.632 | 50.684 | 16.210 | 19.790 | 0.00525 |
| Slc48a1                      | 41.500 | 62.019 | 25.111 | 25.815 | 0.00000 |
| Slfn14-ps                    | 57.292 | 82.750 | 34.125 | 32.792 | 0.00027 |
| Slitrk3, Gm20754             | 21.304 | 36.348 | 12.348 | 14.652 | 0.01861 |
| Smim13                       | 27.062 | 44.125 | 15.938 | 19.312 | 0.13000 |
| Sorbs1                       | 63.273 | 77.818 | 30.091 | 31.546 | 0.01077 |
| Sox12, Zcchc3, 6820408C15Rik | 44.053 | 55.316 | 25.474 | 23.474 | 0.00760 |
| Sp1                          | 35.947 | 51.263 | 20.579 | 22.895 | 0.01229 |
| Sp100                        | 28.393 | 47.214 | 17.643 | 18.107 | 0.00556 |
| Spag9                        | 35.053 | 52.447 | 22.947 | 20.342 | 0.00049 |
| Spcs3                        | 40.706 | 59.118 | 22.177 | 24.588 | 0.02141 |
| Spon2                        | 36.000 | 58.706 | 23.765 | 21.647 | 0.01501 |
| Sqstm1                       | 31.750 | 57.167 | 17.750 | 25.583 | 0.06617 |
| St3gal1, LOC101055818        | 37.095 | 51.048 | 19.095 | 24.143 | 0.03678 |
| St3gal6                      | 28.818 | 45.045 | 18.318 | 16.682 | 0.05111 |
| Stard13                      | 46.462 | 63.000 | 29.154 | 25.231 | 0.03293 |
| Stard3nl                     | 36.370 | 52.407 | 20.333 | 21.815 | 0.00752 |
| Stard4                       | 38.130 | 62.217 | 23.261 | 24.696 | 0.00878 |
| Stat3                        | 33.176 | 50.059 | 19.882 | 20.941 | 0.03634 |
| Sulf1                        | 25.286 | 37.952 | 15.286 | 15.000 | 0.10902 |
| Synpo2                       | 22.636 | 36.818 | 13.318 | 11.818 | 0.00195 |
| Tacc1                        | 40.421 | 53.789 | 20.421 | 23.105 | 0.00739 |
| Tada2a                       | 43.385 | 58.308 | 27.692 | 18.308 | 0.09008 |
| Taok2, Tmem219               | 33.696 | 41.826 | 14.478 | 22.956 | 0.06385 |
| Tceanc                       | 38.781 | 50.156 | 22.625 | 19.875 | 0.00200 |
| Tceanc                       | 22.630 | 28.667 | 12.185 | 13.333 | 0.05225 |
| Tcf4                         | 36.167 | 65.333 | 23.500 | 22.417 | 0.02396 |
| Tecr                         | 66.941 | 91.059 | 39.529 | 36.941 | 0.00352 |
| Tex14, Rnu1a1                | 61.935 | 88.936 | 33.903 | 35.419 | 0.00001 |
| Tfdp2                        | 28.462 | 55.154 | 19.077 | 22.154 | 0.18939 |
| Tgfr3                        | 45.109 | 63.418 | 26.491 | 26.527 | 0.00000 |
| Tjp2                         | 35.412 | 58.824 | 21.765 | 24.588 | 0.07129 |
| Tmem107, Snord118            | 45.857 | 72.929 | 28.143 | 31.179 | 0.00059 |
| Tmem231                      | 58.846 | 77.538 | 31.692 | 29.308 | 0.01358 |
| Tmem41b                      | 41.143 | 54.286 | 22.762 | 24.667 | 0.02174 |
| Tmem44                       | 32.125 | 50.542 | 16.667 | 19.500 | 0.00637 |
| Tns1                         | 39.571 | 53.714 | 23.000 | 19.143 | 0.07627 |



|                          |        |        |        |        |         |
|--------------------------|--------|--------|--------|--------|---------|
| Tns4                     | 49.889 | 70.667 | 28.444 | 30.056 | 0.00442 |
| Tns4                     | 31.840 | 38.200 | 15.560 | 19.360 | 0.09585 |
| Trdmt1, Gm9875           | 38.895 | 50.316 | 19.421 | 18.895 | 0.02623 |
| Trim24                   | 43.333 | 64.333 | 24.600 | 20.400 | 0.00889 |
| Trim8                    | 53.583 | 69.583 | 24.750 | 29.500 | 0.05683 |
| Tspan32                  | 40.136 | 50.364 | 19.273 | 22.864 | 0.00330 |
| Ttc30a2, Ttc30a1, Pde11a | 30.526 | 58.211 | 20.895 | 22.316 | 0.01021 |
| Tulp4                    | 28.500 | 45.000 | 14.938 | 20.188 | 0.08542 |
| Uba1, Cdk16              | 28.069 | 39.586 | 18.586 | 15.000 | 0.01748 |
| Ubald1, Mgrn1            | 35.895 | 52.421 | 19.105 | 23.368 | 0.01596 |
| Ube3a                    | 40.214 | 65.821 | 32.464 | 20.464 | 0.00386 |
| Ube3c                    | 51.316 | 56.158 | 24.895 | 27.474 | 0.01259 |
| Ubqln2                   | 23.125 | 34.833 | 14.542 | 11.375 | 0.02491 |
| Uck2                     | 36.571 | 60.214 | 24.286 | 21.929 | 0.13652 |
| Unc13b, Atp8b5           | 40.963 | 63.185 | 26.148 | 24.296 | 0.00363 |
| Uqcc                     | 28.177 | 45.294 | 21.823 | 13.294 | 0.08502 |
| Usp18                    | 45.958 | 65.375 | 23.875 | 28.042 | 0.00197 |
| Usp49                    | 41.125 | 49.438 | 19.062 | 24.250 | 0.04688 |
| Usp53                    | 29.591 | 46.682 | 15.954 | 16.909 | 0.00245 |
| Vamp2, Per1              | 40.333 | 60.083 | 23.417 | 25.500 | 0.03993 |
| Vegfa                    | 45.929 | 68.857 | 24.857 | 26.929 | 0.02164 |
| Vmp1                     | 21.478 | 32.783 | 8.435  | 13.652 | 0.00772 |
| Vmp1                     | 23.625 | 38.708 | 13.375 | 17.500 | 0.08267 |
| Vps13d                   | 28.825 | 38.075 | 16.550 | 16.475 | 0.00461 |
| Wdr70                    | 25.902 | 38.317 | 17.195 | 14.756 | 0.00480 |
| Wwox                     | 21.150 | 44.300 | 15.900 | 11.550 | 0.01241 |
| Yipf5                    | 46.105 | 65.842 | 24.947 | 29.790 | 0.00955 |
| Zfp13, Zscan10           | 42.171 | 65.286 | 27.057 | 25.914 | 0.00022 |
| Zfp182, Spaca5           | 28.324 | 41.135 | 13.703 | 18.297 | 0.00085 |
| Zfp184                   | 35.800 | 51.133 | 20.933 | 19.533 | 0.01975 |
| Zfp217                   | 30.500 | 38.700 | 16.000 | 15.800 | 0.08391 |
| Zfp219, Tmem253          | 26.421 | 42.421 | 16.158 | 15.210 | 0.04241 |
| Zfp300                   | 28.089 | 38.267 | 17.000 | 15.978 | 0.00064 |
| Zfp341, Chmp4b           | 48.529 | 76.000 | 25.000 | 30.059 | 0.01538 |
| Zfp366                   | 28.474 | 38.053 | 13.368 | 18.158 | 0.05164 |
| Zfp384, Ing4             | 27.357 | 60.071 | 14.571 | 17.857 | 0.00979 |
| Zfp386                   | 32.769 | 72.923 | 29.462 | 18.000 | 0.06474 |
| Zfp474, 1700034E13Rik    | 38.250 | 45.125 | 18.812 | 19.312 | 0.03885 |
| Zfp521                   | 20.632 | 37.158 | 15.421 | 12.684 | 0.03585 |
| Zfp566, Zfp260           | 31.954 | 47.727 | 15.727 | 20.318 | 0.02517 |
| Zfr                      | 24.125 | 37.125 | 14.542 | 14.458 | 0.08644 |
| Zfyve1                   | 35.840 | 59.720 | 21.560 | 23.080 | 0.01284 |
| Zmiz2                    | 32.227 | 54.955 | 22.546 | 18.682 | 0.00468 |

|             |        |        |        |        |         |
|-------------|--------|--------|--------|--------|---------|
| Zmym3, Nono | 32.400 | 41.080 | 20.600 | 13.760 | 0.01208 |
| Znrf1       | 59.455 | 70.636 | 26.727 | 33.545 | 0.03484 |

**Table S4: List of genes showing downregulated H3K9Ac levels at Transcription**

**Start Sites in MCEC treated with db/db EPC-EVs of in H3K9ac-CHIP-seq analysis.**

| Gene List                                            | db+ EPC-1 | db+ EPC-2 | dbdb EPC-1 | dbdb EPC-2 | pvalue  |
|------------------------------------------------------|-----------|-----------|------------|------------|---------|
| 0610030E20Rik, Tmem150a, Rnf181, Vamp5               | 14.216    | 8.622     | 24.703     | 25.459     | 0.02376 |
| 1700123I01Rik, Gpha2, Ppp2r5b                        | 12.030    | 8.455     | 23.182     | 22.849     | 0.00026 |
| 2610507I01Rik, Mrpl55, 2310033P09Rik, Arf1           | 13.615    | 8.846     | 27.269     | 28.192     | 0.00000 |
| 4930481A15Rik, Drap1, Al837181                       | 16.438    | 11.219    | 26.562     | 29.281     | 0.00000 |
| 9130023H24Rik, Armc5, Tgfb1i1                        | 10.293    | 8.171     | 21.098     | 18.024     | 0.00000 |
| AA543186, Man1b1                                     | 17.355    | 9.710     | 28.032     | 28.258     | 0.00005 |
| Ak2                                                  | 18.136    | 11.682    | 36.864     | 29.046     | 0.00010 |
| Ankrd13b, Git1, Trp53i13                             | 13.444    | 7.250     | 18.444     | 23.750     | 0.00007 |
| Atat1, Mrps18b, Ppp1r10, Mir1894                     | 15.954    | 6.953     | 24.977     | 26.000     | 0.06691 |
| Azi1, Enthd2, 1810043H04Rik, Slc38a10                | 12.613    | 7.161     | 24.290     | 21.742     | 0.00000 |
| B3gnt1, Brms1, Rin1                                  | 18.227    | 10.568    | 31.954     | 29.750     | 0.01937 |
| Baiap2                                               | 13.718    | 6.949     | 24.128     | 25.359     | 0.00623 |
| BC033916, BC051226, Daxx, Zbtb22, Gm19412, Tapbp     | 17.216    | 9.081     | 26.514     | 26.919     | 0.02400 |
| Bcl6b, Mir497, Mir195, 0610010K14Rik, Rnasek, Alox12 | 9.353     | 5.088     | 15.971     | 23.059     | 0.00004 |
| Bcl7c, Mir762, Ctf1                                  | 14.414    | 8.552     | 21.069     | 26.069     | 0.00004 |
| Bop1, Hsf1                                           | 14.848    | 9.364     | 22.818     | 26.454     | 0.00002 |
| Brd8, Kif20a, Cdc23                                  | 13.977    | 7.744     | 22.628     | 23.767     | 0.02296 |
| Bsg, Hcn2                                            | 16.273    | 10.273    | 27.939     | 32.455     | 0.00000 |
| Calm3                                                | 16.867    | 11.033    | 29.100     | 34.567     | 0.00000 |
| Cant1                                                | 19.095    | 8.833     | 26.024     | 30.452     | 0.04400 |
| Ccdc137, Arl16, Hgs                                  | 18.081    | 11.135    | 32.811     | 28.919     | 0.04941 |
| Ccnk, Ccdc85c                                        | 11.200    | 6.575     | 20.750     | 16.575     | 0.00004 |
| Ccs, Ccdc87                                          | 21.821    | 9.786     | 31.607     | 32.679     | 0.04847 |
| Cd248, Tmem151a, Yif1a, Cnih2                        | 24.718    | 13.177    | 38.306     | 41.153     | 0.02331 |
| Cd2bp2, Tbc1d10b                                     | 12.735    | 5.928     | 25.241     | 19.422     | 0.03510 |
| Cdca4                                                | 14.432    | 12.136    | 26.296     | 30.136     | 0.00000 |
| Cebpz, Ndufaf7                                       | 15.871    | 9.226     | 33.903     | 31.032     | 0.00180 |
| Cep170b                                              | 11.261    | 7.391     | 17.283     | 21.435     | 0.00000 |
| Chtf18, Rpusd1, Msln1                                | 19.868    | 9.019     | 31.509     | 32.792     | 0.05748 |
| Cirbp, 1600002K03Rik, Efna2                          | 16.727    | 10.886    | 27.341     | 28.954     | 0.00459 |
| Cnot10                                               | 12.794    | 8.000     | 20.235     | 22.147     | 0.00007 |
| Cog2                                                 | 15.688    | 8.542     | 28.458     | 30.521     | 0.02594 |
| Cpne9, Brpf1                                         | 13.756    | 8.133     | 27.378     | 27.556     | 0.04347 |
| Crtc1                                                | 15.269    | 7.769     | 28.808     | 21.000     | 0.05868 |
| Csk                                                  | 18.948    | 11.948    | 32.740     | 32.104     | 0.01494 |
| Ctdnep1, Gabarap, Phf23, Dvl2                        | 13.897    | 9.931     | 21.897     | 27.000     | 0.00014 |
| Cyhr1, Kifc2, Foxh1, Ppp1r16a                        | 14.450    | 8.712     | 25.633     | 26.383     | 0.01981 |
| D030047H15Rik, Leng8, Leng9, Cdc42ep5                | 9.143     | 7.786     | 15.214     | 20.333     | 0.00001 |
| D10Jhu81e, Pwp2                                      | 10.793    | 8.017     | 20.207     | 18.690     | 0.00000 |
| D17H6S53E, Apom, Bag6, Prrc2a                        | 13.816    | 10.868    | 22.684     | 28.316     | 0.00000 |
| Dffb, Cep104                                         | 13.087    | 6.652     | 22.435     | 21.435     | 0.03386 |
| Dnajc7, Nkiras2, Zfp385c                             | 20.873    | 13.891    | 31.836     | 38.600     | 0.01470 |
| Doc2g, Ndufv1                                        | 16.467    | 10.333    | 26.756     | 29.356     | 0.02710 |
| Dot1l, Plekhj1, Sf3a2, Amh, Jsrrp1                   | 10.115    | 6.808     | 18.635     | 17.538     | 0.00001 |
| Ehbp1l1, Fam89b, Sssca1                              | 19.194    | 11.556    | 29.694     | 35.417     | 0.00656 |
| Fads1, LOC101055817, Fen1, Tmem258, Myrf             | 21.742    | 15.161    | 38.903     | 36.677     | 0.00661 |

|                                          |        |        |        |        |         |
|------------------------------------------|--------|--------|--------|--------|---------|
| Fads1, LOC101055817, Fen1, Tmem258, Myrf | 20.914 | 11.257 | 32.457 | 37.171 | 0.01787 |
| Fam222b, Traf4, Nek8                     | 14.191 | 6.404  | 26.425 | 21.425 | 0.05001 |
| Fam73b, Dolpp1, Crat                     | 13.723 | 6.362  | 22.575 | 26.575 | 0.01523 |
| Fance                                    | 19.467 | 10.867 | 28.733 | 32.733 | 0.01253 |
| Fasn, Ccdc57                             | 13.353 | 8.647  | 23.206 | 25.647 | 0.00004 |
| Fbxl16, Wdr24, Jmjd8, Stub1, Rhbd1       | 15.657 | 5.514  | 25.057 | 29.257 | 0.07768 |
| Fbxl18                                   | 13.762 | 9.000  | 30.071 | 31.381 | 0.00545 |
| Fbxl18, D430018E03Rik                    | 16.226 | 9.925  | 31.076 | 27.849 | 0.00746 |
| Fem1a, Ticam1                            | 18.891 | 11.435 | 31.370 | 32.109 | 0.01406 |
| Foxk1                                    | 21.304 | 12.443 | 37.937 | 38.215 | 0.00395 |
| Fzr1, Dohh, 2210404O07Rik, Nfic          | 15.062 | 7.979  | 24.896 | 23.458 | 0.05521 |
| Galt, Il11ra1, Ccl27a                    | 11.680 | 4.960  | 15.920 | 22.940 | 0.05083 |
| Gga1                                     | 17.620 | 10.422 | 26.451 | 30.422 | 0.02222 |
| Gga1, Gm10866, Sh3bp1                    | 12.000 | 8.976  | 23.048 | 21.786 | 0.00001 |
| Gins4, Golga7                            | 12.528 | 8.694  | 24.278 | 24.639 | 0.00000 |
| Gjc2, Guk1                               | 10.550 | 6.750  | 21.500 | 19.525 | 0.00000 |
| Gm4532, Zfp553                           | 11.643 | 7.810  | 19.357 | 20.905 | 0.00033 |
| Gpatch3, Gpn2                            | 14.861 | 7.581  | 24.163 | 23.256 | 0.01267 |
| Gpbar1, Aamp, Pnkd, Tmbim1               | 12.917 | 8.194  | 22.306 | 25.694 | 0.00000 |
| Grik5, Zfp574                            | 13.974 | 6.789  | 22.316 | 25.974 | 0.03611 |
| Grin3b, Tmem259, Cnn2                    | 15.773 | 10.796 | 30.114 | 27.909 | 0.00407 |
| Gse1, Gins2, Gm10614                     | 12.641 | 6.026  | 22.282 | 24.974 | 0.02440 |
| Hras1, Lrrc56                            | 10.268 | 7.439  | 23.634 | 24.024 | 0.00000 |
| Ift172, Fndc4, Gckr                      | 12.500 | 7.235  | 19.177 | 22.853 | 0.00119 |
| Inpp5b, Mtf1                             | 11.517 | 6.310  | 25.862 | 24.862 | 0.01585 |
| Ints1                                    | 14.667 | 6.857  | 26.429 | 33.238 | 0.01248 |
| Jag2, Nudt14                             | 12.486 | 10.784 | 25.027 | 23.784 | 0.00000 |
| Kcnh3, Mcrs1, 1700120C14Rik              | 17.311 | 11.068 | 29.838 | 33.000 | 0.00354 |
| Kcnh4, Hcrt, Ghdc                        | 13.180 | 7.538  | 25.923 | 23.103 | 0.01010 |
| Kcnk4, Gpr137, Bad                       | 18.771 | 7.571  | 27.371 | 31.971 | 0.05120 |
| Khsrp, Slc25a41                          | 14.143 | 8.000  | 26.171 | 20.657 | 0.00011 |
| Klc1, Xrcc3, Zfyve21                     | 14.969 | 8.766  | 26.375 | 28.469 | 0.00362 |
| Kri1, Cdkn2d, Ap1m2                      | 15.407 | 5.963  | 21.963 | 27.815 | 0.07325 |
| Lamb2, Usp19                             | 13.917 | 5.625  | 22.458 | 23.854 | 0.02060 |
| Limk1, Gm10369                           | 17.235 | 10.897 | 28.691 | 28.529 | 0.00302 |
| Lpcat1                                   | 11.853 | 7.265  | 22.971 | 19.235 | 0.00001 |
| Lrrc8a                                   | 12.114 | 5.057  | 20.886 | 15.914 | 0.00088 |
| Ly6g5b, Csnk2b, Gpank1, D17H6S53E, Apom  | 16.909 | 5.333  | 29.242 | 27.394 | 0.04172 |
| Mafk, Tmem184a                           | 19.231 | 9.904  | 32.846 | 30.423 | 0.03349 |
| Map3k4, 4732491K20Rik                    | 11.903 | 10.613 | 23.258 | 23.677 | 0.00003 |
| Mbtps1, Hsd1                             | 13.216 | 7.027  | 23.243 | 24.541 | 0.00000 |
| Mbtps1, Hsd1, Dnaaf1                     | 11.120 | 6.104  | 22.040 | 18.440 | 0.03706 |
| Men1, Map4k2                             | 16.067 | 8.400  | 27.100 | 27.067 | 0.01698 |

|                                                     |        |        |        |        |         |
|-----------------------------------------------------|--------|--------|--------|--------|---------|
| Mex3a, Mir1905                                      | 13.275 | 9.175  | 22.450 | 24.800 | 0.00000 |
| Micall1, 1700088E04Rik, Polr2f                      | 18.250 | 7.958  | 30.042 | 30.083 | 0.03096 |
| Midn                                                | 18.393 | 10.071 | 31.750 | 36.357 | 0.01654 |
| Mpv17l2, Ifi30, Pik3r2, 2010320M18Rik, Mast3        | 22.145 | 13.194 | 40.065 | 35.242 | 0.01010 |
| Mrpl12, Gm16755, Slc25a10                           | 9.778  | 8.694  | 21.444 | 21.083 | 0.00001 |
| Mrto4, Emc1                                         | 11.567 | 6.433  | 18.933 | 23.700 | 0.00004 |
| Mvp, Pagr1a, Prrt2, Maz, Kif22                      | 15.262 | 9.310  | 22.881 | 26.548 | 0.01869 |
| Myo9b, Use1, Ocel1, Nr2f6                           | 14.515 | 10.667 | 27.697 | 27.030 | 0.00000 |
| Naaladl1, Sac3d1, Snx15                             | 16.217 | 11.652 | 33.391 | 25.739 | 0.00001 |
| Naaladl1, Sac3d1, Snx15                             | 13.923 | 10.615 | 27.769 | 29.846 | 0.00001 |
| Naaladl1, Sac3d1, Snx15                             | 15.100 | 5.433  | 25.733 | 27.733 | 0.06868 |
| Narfl, Haghl                                        | 15.462 | 10.051 | 29.641 | 36.821 | 0.00159 |
| Narfl, Haghl, Ccdc78, Fam173a, Metrn                | 10.800 | 6.550  | 22.425 | 22.150 | 0.00000 |
| Nlk                                                 | 15.542 | 7.667  | 24.833 | 30.542 | 0.00005 |
| Parp10, Grina                                       | 10.278 | 5.912  | 17.639 | 22.806 | 0.00001 |
| Pcbp4, Gpr62, Parp3, Rrp9                           | 11.559 | 8.559  | 24.147 | 20.971 | 0.00002 |
| Pcnx13, Map3k11                                     | 21.956 | 6.911  | 32.289 | 34.711 | 0.08025 |
| Pcx, Lrfn4, Rce1, Gm960                             | 13.030 | 8.303  | 22.000 | 26.636 | 0.00005 |
| Pigz, 0610012G03Rik, Ncbp2                          | 11.073 | 6.171  | 19.122 | 22.146 | 0.01867 |
| Plcxd1, Gtpbp6, Zfp605                              | 11.595 | 6.703  | 23.892 | 20.297 | 0.02105 |
| Plxnb2, Dennd6b                                     | 14.760 | 10.200 | 23.800 | 28.840 | 0.00029 |
| Pold1, Nr1h2                                        | 17.034 | 10.602 | 29.068 | 28.025 | 0.00312 |
| Ppard                                               | 10.964 | 8.643  | 21.286 | 25.714 | 0.00000 |
| Ppil1, BC004004                                     | 20.694 | 9.714  | 30.224 | 31.776 | 0.04274 |
| Ppp1r14b, Fkbp2, Vegfb, Dnajc4                      | 16.750 | 12.375 | 30.750 | 27.708 | 0.00039 |
| Ppp2r5b, Atg2a                                      | 20.636 | 11.970 | 33.030 | 38.485 | 0.01456 |
| Ppp2r5d, Pex6                                       | 12.645 | 7.355  | 18.936 | 23.419 | 0.00003 |
| Psmb11, Cdh24, Acin1                                | 11.902 | 7.854  | 19.488 | 22.707 | 0.00001 |
| Psmg3                                               | 15.381 | 8.762  | 35.333 | 29.381 | 0.00001 |
| Ptpn6, Grcc10, Rnu7, Atn1                           | 12.241 | 8.690  | 21.345 | 29.103 | 0.00001 |
| Rab35, Ccdc64                                       | 13.068 | 6.159  | 23.159 | 21.364 | 0.01102 |
| Rab3a, Mpv17l2, Ifi30, Pik3r2                       | 21.727 | 14.273 | 37.091 | 37.212 | 0.00749 |
| Rab3a, Mpv17l2, Ifi30, Pik3r2, 2010320M18Rik, Mast3 | 14.172 | 8.759  | 23.690 | 24.897 | 0.00002 |
| Radil                                               | 12.773 | 10.909 | 22.364 | 31.682 | 0.00048 |
| Ranbp3, Vmac, Ndufa11                               | 12.220 | 6.240  | 23.560 | 20.760 | 0.01791 |
| Rasa4, Polr2j, Lrwd1                                | 19.750 | 11.821 | 33.643 | 32.607 | 0.00000 |
| Rbfa, Txnl4a                                        | 13.966 | 8.621  | 22.517 | 26.862 | 0.00003 |
| Rexo1, Klf16                                        | 12.490 | 7.510  | 20.388 | 20.694 | 0.00000 |
| Rgl2, H2-Ke2, Wdr46, B3galt4, Rps18                 | 17.546 | 5.303  | 25.121 | 23.849 | 0.13434 |
| Rhbdl1, Rhot2, Wdr90                                | 12.389 | 7.167  | 22.861 | 21.750 | 0.00002 |
| Rpap3, Endou                                        | 15.100 | 8.100  | 24.533 | 27.367 | 0.00001 |
| Rrp36, Klhdc3, Mea1, Ppp2r5d                        | 18.288 | 10.865 | 32.096 | 31.385 | 0.01661 |
| Rrp36, Klhdc3, Mea1, Ppp2r5d                        | 11.652 | 6.561  | 21.606 | 23.121 | 0.00696 |

|                                       |        |        |        |        |         |
|---------------------------------------|--------|--------|--------|--------|---------|
| Rsph6a, Dmwd, Dmpk, Mir3100           | 11.154 | 8.308  | 19.051 | 22.128 | 0.00002 |
| Sart1, D330050I16Rik, Tsga10ip        | 19.852 | 12.185 | 40.074 | 32.667 | 0.00308 |
| Scaf1, Rras, Prr12                    | 11.375 | 7.917  | 20.417 | 21.875 | 0.02143 |
| Skiv2l, Nelfe, Cfb, C2                | 10.059 | 8.382  | 21.647 | 28.382 | 0.00000 |
| Slc11a1, Ctdsp1, Mir26b               | 14.220 | 9.627  | 24.322 | 24.915 | 0.00199 |
| Slc26a8, Mapk14                       | 15.771 | 7.029  | 26.886 | 27.286 | 0.02578 |
| Slc27a5, Zbtb45                       | 13.353 | 9.176  | 24.559 | 23.206 | 0.00001 |
| Slc35e1, Med26                        | 13.219 | 9.688  | 24.844 | 22.719 | 0.00021 |
| Smarcc2, Myl6, Myl6b, LOC100502705    | 10.244 | 7.537  | 18.366 | 19.244 | 0.00001 |
| Snhg10, Scarna13, Mir3069, Glrx5      | 24.558 | 14.154 | 38.519 | 39.308 | 0.02176 |
| Sra1, Apbb3, Slc35a4, E230025N22Rik   | 16.556 | 9.444  | 27.815 | 29.630 | 0.00021 |
| Srebf1                                | 16.697 | 11.333 | 31.000 | 28.727 | 0.03120 |
| Stampb, Gm21284                       | 10.677 | 5.645  | 21.839 | 27.581 | 0.00000 |
| Stk19, Dom3z, Skiv2l                  | 14.950 | 5.825  | 26.525 | 30.125 | 0.03576 |
| Surf6, Med22, Rpl7a, Surf1, Surf2     | 15.706 | 8.000  | 23.667 | 25.294 | 0.01641 |
| Taf5, Usmg5, Pdcd11                   | 16.000 | 7.710  | 23.452 | 24.710 | 0.05076 |
| Tapbp, Rgl2, H2-Ke2, Wdr46            | 11.000 | 5.114  | 22.000 | 20.543 | 0.04871 |
| Tjp3, Pip5k1c                         | 14.542 | 7.514  | 23.556 | 22.264 | 0.04706 |
| Tmem151a, Yif1a, Cnih2, Rab1b         | 16.692 | 9.231  | 27.269 | 30.038 | 0.00000 |
| Tmem223, Tmem179b, Taf6l, Polr2g      | 15.237 | 8.026  | 27.263 | 29.737 | 0.01439 |
| Tmem95, Kctd11, Acap1                 | 12.667 | 9.500  | 19.833 | 24.867 | 0.00061 |
| Tmub2, Atxn7l3                        | 12.277 | 7.851  | 21.106 | 20.553 | 0.00001 |
| Tonsl, Cyhr1                          | 12.591 | 9.500  | 24.182 | 32.091 | 0.00001 |
| Trappc12, Tssc1                       | 17.074 | 7.889  | 27.074 | 32.481 | 0.06353 |
| Troap, C1ql4                          | 19.095 | 10.063 | 28.302 | 33.968 | 0.03202 |
| Ttpal                                 | 16.127 | 8.182  | 25.055 | 25.382 | 0.02631 |
| Ttyh1, D030047H15Rik, Leng8           | 11.988 | 6.096  | 17.133 | 21.482 | 0.04132 |
| Tulp3, LOC101055755, Rhno1, Foxm1     | 11.515 | 6.606  | 18.636 | 23.273 | 0.00037 |
| Txn2, Foxred2                         | 12.806 | 11.472 | 26.417 | 23.806 | 0.00000 |
| Uggt1                                 | 18.600 | 9.760  | 25.680 | 31.320 | 0.00012 |
| Usp49, Tomm6, Gm14872, Prickle4, Frs3 | 18.348 | 15.696 | 36.435 | 39.348 | 0.00000 |
| Usp5, Cdca3, Gnb3, Leprel2            | 12.200 | 9.400  | 22.689 | 24.956 | 0.00000 |
| Vegfb, Dnajc4, Nudt22, Trpt1, Fermt3  | 12.963 | 5.519  | 25.074 | 28.074 | 0.01263 |
| Wdr82, Ppm1m, Twf2                    | 14.794 | 7.912  | 25.500 | 23.029 | 0.00000 |
| Xab2, Pet100, Pcp2, Stxbp2            | 15.925 | 9.275  | 30.725 | 29.450 | 0.02876 |
| Xpo5, Polr1c, Yipf3, Lrrc73           | 13.800 | 8.800  | 22.633 | 28.033 | 0.00001 |
| Zbtb17                                | 17.064 | 7.355  | 28.936 | 25.710 | 0.03616 |
| Zc3h3                                 | 10.750 | 6.179  | 25.607 | 27.500 | 0.00000 |
| Zfpm1                                 | 15.510 | 9.204  | 24.326 | 26.816 | 0.01874 |

**Table S5:** List of genes showing upregulated H3K9Ac levels at Transcription Start Sites

in MCEC treated with db/db EPC-EVs of in H3K9ac-CHIP-seq analysis.
